# Supplementary material for: Effect of a reduced fat and sugar maternal dietary intervention during lactation on the infant gut microbiome
Source: Front Microbiol. 2022 Aug 17;13:900702. doi: 10.3389/fmicb.2022.900702 (PMC9428759; doi:10.3389/fmicb.2022.900702)
Supplement: Supplementary file 3 [file Table_3.XLSX]

## Sheet: Sheet1
A- Fibre relative difference:
Enzyme Commission (EC) numbers
Function	Annotation	P Pearson correlation (sqrt)	r Pearson correlation (sqrt)	Mean Pos	Mean Abundance	Median Abundance
2.7.1.76	Deoxyadenosine kinase.	0.0064	-0.823	4e-05	1.9e-05	7.8e-06
4.6.1.3	Transferred entry: 4.2.3.4.	0.0086	0.807	7.3e-06	-2.6e-06	0
3.1.2.14	Oleoyl-[acyl-carrier-protein] hydrolase.	0.011	0.792	0.0029	0.0022	0.00033
2.5.1.57	N-acylneuraminate-9-phosphate synthase.	0.012	0.786	NA	-1.2e-05	0
2.6.1.45	Serine--glyoxylate transaminase.	0.013	-0.778	1.5e-05	1.7e-06	0
1.1.1.108	Carnitine 3-dehydrogenase.	0.013	-0.78	1.5e-05	1.7e-06	0
2.4.1.21	Starch synthase.	0.022	-0.742	0.0032	0.00016	-0.0002
6.3.2.30	Cyanophycin synthase (L-arginine-adding).	0.025	0.731	7.6e-06	-0.00011	0
1.18.1.7	Ferredoxin--NAD(P)(+) reductase (naphthalene dioxygenase ferredoxin-	0.027	0.726	NA	-7.7e-06	0
2.5.1.68	(2Z.6E)-farnesyl diphosphate synthase.	0.029	-0.719	2.1e-05	6.9e-06	0
3.5.1.38	Glutamin-(asparagin-)ase.	0.03	-0.716	0.00025	0.00011	0
2.7.1.32	Choline kinase.	0.03	0.717	1.1e-05	-3.2e-05	7.8e-06
1.14.19.3	Acyl-CoA 6-desaturase.	0.034	0.705	8e-06	-1.9e-05	0
3.2.1.129	Endo-alpha-sialidase.	0.039	0.693	0.00025	-0.00036	0
6.4.1.1	Pyruvate carboxylase.	0.041	-0.687	0.0034	-0.0016	-0.0014
3.1.1.47	1-alkyl-2-acetylglycerophosphocholine esterase.	0.042	-0.684	8.1e-05	-2.2e-05	0
MetaCyc group
Function	P Pearson correlation (sqrt)	r Pearson correlation (sqrt)	Mean Pos	Mean Abundance	Median Abundance
Storage Compound Biosynthesis	0.018	0.758	1.7e-05	-0.00011	0
MetaCyc pathways
Function	P Pearson correlation (sqrt)	r Pearson correlation (sqrt)	Mean Pos	Mean Abundance	Median Abundance
PWY-5142~acyl-[acyl-carrier protein] thioesterase pathway	0.0098	0.799	0.0041	0.0022	0.00031
PWY-7210~pyrimidine deoxyribonucleotides biosynthesis from CTP	0.013	0.781	3.5e-05	-1.6e-05	0
PWY-7847~heme degradation VI	0.03	-0.716	7.7e-06	-6.6e-08	0
PWY-7052~cyanophycin metabolism	0.035	0.701	2.8e-05	-0.00012	0
Membrane Transport Proteins (TCDB)
Function	Annotation	P Pearson correlation (sqrt)	r Pearson correlation (sqrt)	Mean Pos	Mean Abundance	Median Abundance
2.A.1.15.2	The Major Facilitator Superfamily (MFS)	0.012	0.785	0.00013	1.3e-05	0
2.A.1.46.10	The Major Facilitator Superfamily (MFS)	0.015	-0.773	2.3e-05	-1.4e-07	0
2.A.47.1.11	The Divalent Anion:Na<sup>+</sup> Symporter (DASS) Family	0.024	-0.734	1.5e-05	8.5e-06	7.6e-06
3.A.1.110.1	The ATP-binding Cassette (ABC) Superfamily	0.03	0.717	4.2e-05	-0.00025	0
4.D.1.1.11	The Putative Vectorial Glycosyl Polymerization (VGP) Family	0.039	0.691	0.00022	4.8e-05	0
2.A.1.3.4	The Major Facilitator Superfamily (MFS)	0.044	-0.679	1.2e-05	1.7e-06	0
1.C.3.4.3	The ÃŽÂ±-Hemolysin Channel-forming Toxin (ÃŽÂ±HL) Family	0.045	-0.676	2e-05	6.8e-06	0
3.A.1.106.2	The ATP-binding Cassette (ABC) Superfamily	0.045	-0.678	1.2e-05	2.9e-06	0
B- Protein relative difference:
Enzyme Commission (EC) numbers
Function	Annotation	P Pearson correlation (sqrt)	r Pearson correlation (sqrt)	Mean Pos	Mean Abundance	Median Abundance
2.7.9.1	Pyruvate. phosphate dikinase.	0.00038	-0.924	0.0028	-0.0029	-0.0024
3.1.4.37	2'.3'-cyclic-nucleotide 3'-phosphodiesterase.	0.0031	-0.858	0.00024	0.00013	7.3e-06
2.7.1.5	Rhamnulokinase.	0.0041	-0.846	0.0036	-0.00092	-0.0016
6.3.2.54	L-2.3-diaminopropanoate--citrate ligase.	0.0041	0.845	7.8e-06	-1.7e-06	0
2.5.-.-		0.005	-0.836	0.00023	9.7e-05	0
6.2.1.17	Propionate--CoA ligase.	0.0057	0.829	0.00083	0.00043	7.7e-06
2.7.7.39	Glycerol-3-phosphate cytidylyltransferase.	0.0069	-0.819	0.0007	0.0002	7.8e-06
2.6.1.42	Branched-chain-amino-acid transaminase.	0.012	-0.788	0.0031	-0.0002	-0.0012
4.3.99.2	Transferred entry: 7.2.4.1.	0.013	-0.782	0.0015	8.4e-05	0
3.5.4.31	S-methyl-5'-thioadenosine deaminase.	0.013	-0.781	0.00075	0.00022	4.3e-05
5.5.1.4	Inositol-3-phosphate synthase.	0.014	-0.775	0.00076	-0.00036	-2.7e-05
1.7.99.7	Transferred entry: 1.7.2.5.	0.017	-0.763	0.00037	0.00015	0
5.4.3.9	Glutamate 2.3-aminomutase.	0.021	-0.745	0.0021	-1.7e-05	0
3.5.2.14	N-methylhydantoinase (ATP-hydrolyzing).	0.024	-0.735	0.00022	4.8e-05	0
1.6.99.-		0.024	-0.737	0.0034	0.0018	0.0014
3.5.1.38	Glutamin-(asparagin-)ase.	0.025	-0.73	0.00025	0.00011	0
1.12.1.3	Hydrogen dehydrogenase (NADP(+)).	0.026	-0.728	0.0023	-0.00014	0
3.5.99.7	1-aminocyclopropane-1-carboxylate deaminase.	0.027	-0.726	0.0013	-0.00091	-0.00039
1.14.12.21	Transferred entry: 1.14.13.208.	0.028	-0.722	0.00044	1.3e-05	0
3.5.4.2	Adenine deaminase.	0.029	-0.72	0.0033	0.0022	0.003
2.7.8.13	Phospho-N-acetylmuramoyl-pentapeptide-transferase.	0.031	-0.714	0.002	0.001	0.0014
2.1.3.11	N-succinylornithine carbamoyltransferase.	0.031	-0.712	0.00082	-0.00012	0
1.1.1.193	5-amino-6-(5-phosphoribosylamino)uracil reductase.	0.031	-0.714	0.0024	0.0013	0.00098
4.1.1.12	Aspartate 4-decarboxylase.	0.032	-0.71	0.00075	2.9e-05	7.8e-06
2.7.8.11	CDP-diacylglycerol--inositol 3-phosphatidyltransferase.	0.032	-0.711	0.00052	-6.5e-06	-3.1e-05
3.1.3.71	2-phosphosulfolactate phosphatase.	0.032	-0.71	0.00011	-0.00067	-0.0001
1.1.1.204	Transferred entry: 1.17.1.4.	0.034	-0.704	0.00012	4.8e-05	0
1.14.13.81	Magnesium-protoporphyrin IX monomethyl ester (oxidative) cyclase.	0.034	-0.704	0.00049	-6.1e-05	0
3.1.26.-		0.037	-0.696	0.0033	0.00062	0.0009
1.1.1.170	3-beta-hydroxysteroid-4-alpha-carboxylate 3-dehydrogenase	0.038	0.694	0.00032	7.8e-05	0
3.5.4.26	Diaminohydroxyphosphoribosylaminopyrimidine deaminase.	0.038	-0.695	0.0023	0.0012	0.00098
3.4.24.64	Mitochondrial processing peptidase.	0.044	0.68	0.00027	4.2e-05	0
1.1.1.272	D-2-hydroxyacid dehydrogenase (NADP(+)).	0.044	-0.679	0.00047	-0.00053	-1.6e-07
2.7.1.1	Hexokinase.	0.044	-0.679	0.0013	0.00025	0
2.4.1.278	3-alpha-mycarosylerythronolide B desosaminyl transferase.	0.045	0.678	0.00013	1.4e-05	0
6.3.2.2	Glutamate--cysteine ligase.	0.049	0.668	0.0065	0.0057	0.0038
MetaCyc pathways
Function	P Pearson correlation (sqrt)	r Pearson correlation (sqrt)	Mean Pos	Mean Abundance	Median Abundance
PWY-2301~myo-inositol biosynthesis	0.0048	-0.838	0.00088	-0.00021	-4.8e-05
PWY-6765~hydrogen production IV	0.027	-0.727	0.0023	-0.00015	0
PWY-6512~hydrogen oxidation III (anaerobic NADP)	0.027	-0.727	0.0023	-0.00015	0
HSERMETANA-PWY~L-methionine biosynthesis III	0.029	-0.718	0.0014	-0.0017	-0.00081
PWY-7625~phosphatidylinositol biosynthesis II (eukaryotes)	0.036	-0.701	0.00052	-7.4e-06	-3.1e-05
PWY-7346~UDP-Î±-D-glucuronate biosynthesis (from UDP-glucose)	0.038	-0.695	0.0065	0.00045	0.00017
PWY-5177~glutaryl-CoA degradation	0.047	0.673	0.001	0.00043	0
Membrane Transport Proteins (TCDB)
Function	Annotation	P Pearson correlation (sqrt)	r Pearson correlation (sqrt)	Mean Pos	Mean Abundance	Median Abundance
2.A.1.7.17	The Major Facilitator Superfamily (MFS)	0.011	-0.79	0.0017	9.8e-05	0
2.A.35.1.8	The NhaC Na<sup>+</sup>:H<sup>+</sup> Antiporter (NhaC) Family	0.019	-0.754	0.0026	4e-06	0
1.B.14.6.5	The Outer Membrane Receptor (OMR) Family	0.021	-0.745	0.0026	0.00058	0
2.A.21.3.19	The Solute:Sodium Symporter (SSS) Family	0.025	-0.733	0.00093	-8.5e-05	0
3.A.17.1.1	The Phage T7 Injectisome (T7 Injectisome) Family	0.036	0.699	4.8e-05	-1.5e-06	0
3.A.1.14.18	The ATP-binding Cassette (ABC) Superfamily	0.038	0.693	0.00074	0.00011	0
2.A.113.1.1	The Nickel/cobalt Transporter (NicO) Family	0.039	0.692	0.00017	6.7e-05	0
9.A.38.1.2	The Bacteriocin Immunity Protein (BIP) Family	0.039	0.691	1.3e-05	1.8e-06	0
C- Sugar relative difference:
Enzyme Commission (EC) numbers
Function	Annotation	P Pearson correlation (sqrt)	r Pearson correlation (sqrt)	Mean Pos	Mean Abundance	Median Abundance
2.7.9.-		0.00051	-0.916	0.0011	0.00012	0
1.17.98.1	Transferred entry: 1.1.1.395.	0.00062	-0.912	0.00037	4.1e-05	0
1.2.3.3	Pyruvate oxidase.	0.001	-0.898	0.0014	-8e-05	-7.4e-06
5.1.1.4	Proline racemase.	0.0031	-0.858	0.00072	7.4e-05	0
2.7.1.36	Mevalonate kinase.	0.004	-0.846	0.00058	0.0003	3.1e-05
4.1.1.33	Diphosphomevalonate decarboxylase.	0.0055	-0.831	0.00049	0.00022	2.4e-05
2.3.1.89	Tetrahydrodipicolinate N-acetyltransferase.	0.0068	-0.82	0.0017	0.00014	-0.00035
5.4.2.6	Beta-phosphoglucomutase.	0.0074	-0.815	0.0014	-5.8e-05	-6.1e-05
2.4.1.305	UDP-Glc:alpha-D-GlcNAc-glucosaminyl-diphosphoundecaprenol beta-1.3-	0.009	-0.804	0.00029	-0.00038	-7.8e-06
1.1.1.50	3-alpha-hydroxysteroid 3-dehydrogenase (Si-specific).	0.011	0.792	0.0013	0.00012	0
2.7.4.2	Phosphomevalonate kinase.	0.011	-0.789	0.00035	0.00016	1.7e-05
1.1.3.15	(S)-2-hydroxy-acid oxidase.	0.011	0.794	0.0022	0.0013	0.0004
1.21.4.1	D-proline reductase.	0.012	-0.785	0.0011	0.00022	0
2.7.8.40	UDP-N-acetylgalactosamine-undecaprenyl-phosphate	0.012	-0.783	6.7e-05	3.1e-06	0
6.2.1.54	D-alanine--[D-alanyl-carrier protein] ligase.	0.013	-0.782	0.001	0.00037	-6.3e-07
3.4.17.14	Zinc D-Ala-D-Ala carboxypeptidase.	0.015	-0.769	0.00072	-9.1e-06	0
1.14.13.48	Transferred entry: 1.14.14.51.	0.015	0.769	0.0068	0.0047	0.00057
3.6.3.4	Transferred entry: 7.2.2.9.	0.016	0.765	0.019	0.017	0.0088
3.4.13.22	D-Ala-D-Ala dipeptidase.	0.016	-0.766	0.0012	-0.00027	-7.7e-06
2.6.1.85	Aminodeoxychorismate synthase.	0.017	0.763	0.0056	0.0042	0.0045
2.7.1.33	Pantothenate kinase.	0.017	-0.761	0.0022	0.00082	0.0011
3.2.2.n1	Cytokinin riboside 5'-monophosphate phosphoribohydrolase.	0.019	0.752	0.0033	0.0028	0.0022
2.6.1.42	Branched-chain-amino-acid transaminase.	0.02	-0.749	0.0031	-0.0002	-0.0012
2.3.1.n4	1-acyl-sn-glycerol-3-phosphate acyltransferase.	0.021	-0.745	0.00013	-0.00014	2.3e-05
2.1.4.1	Glycine amidinotransferase.	0.022	0.741	NA	-7.3e-05	0
6.3.3.-		0.023	0.74	NA	-9.6e-06	0
3.2.1.50	Alpha-N-acetylglucosaminidase.	0.023	-0.738	0.00015	-3.5e-05	0
3.6.3.30	Transferred entry: 7.2.2.7.	0.023	0.74	0.012	0.012	0.0086
2.4.1.187	N-acetylglucosaminyldiphosphoundecaprenol N-acetyl-beta-D-	0.023	-0.74	0.0017	0.0005	0.00035
3.8.1.5	Haloalkane dehalogenase.	0.025	0.732	0.0038	0.0019	3.1e-05
1.12.1.4	Hydrogenase (NAD(+). ferredoxin).	0.025	0.731	NA	-2.1e-05	0
1.6.99.1	NADPH dehydrogenase.	0.026	0.729	0.0096	0.0073	0.0033
1.1.1.130	3-dehydro-L-gulonate 2-dehydrogenase.	0.027	-0.724	0.00069	-0.00057	0.00039
2.3.1.128	Transferred entry: 2.3.1.267.	0.027	0.724	0.0057	0.005	0.0035
3.2.2.24	ADP-ribosyl-[dinitrogen reductase] hydrolase.	0.027	-0.726	0.0016	-0.0011	-8.9e-06
5.4.99.2	Methylmalonyl-CoA mutase.	0.028	-0.721	0.0038	-0.0024	0.00026
4.2.1.20	Tryptophan synthase.	0.028	0.723	0.0062	0.0045	0.0023
1.1.1.192	Long-chain-alcohol dehydrogenase.	0.029	0.718	0.0075	0.0058	5.6e-05
4.1.1.41	Transferred entry: 7.2.4.3.	0.029	-0.719	0.0034	-0.002	0.00098
1.2.99.2	Transferred entry: 1.2.7.4.	0.03	-0.715	0.00064	-0.00016	3.6e-05
3.1.1.1	Carboxylesterase.	0.03	0.715	0.0094	0.0046	0.0001
1.5.1.7	Saccharopine dehydrogenase (NAD(+). L-lysine-forming).	0.03	-0.716	0.00086	-0.001	-0.00045
2.4.1.1	Glycogen phosphorylase.	0.031	0.712	0.008	0.008	0.0061
5.3.-.-		0.032	0.711	0.0002	-8.8e-05	-1.2e-07
2.3.1.183	Phosphinothricin acetyltransferase.	0.032	0.71	0.0038	0.0028	0.00093
2.4.1.290	N.N'-diacetylbacillosaminyl-diphospho-undecaprenol alpha-1.3-N-	0.033	0.707	0.005	0.001	0
3.1.26.-		0.033	-0.708	0.0033	0.00062	0.0009
2.7.7.63	Transferred entry: 6.3.1.20.	0.033	0.708	0.0051	0.003	0.0012
3.2.2.1	Purine nucleosidase.	0.033	0.707	0.0088	0.0053	0.003
3.2.1.179	Gellan tetrasaccharide unsaturated glucuronosyl hydrolase.	0.034	-0.705	0.0073	-0.0004	0
4.1.2.48	Low-specificity L-threonine aldolase.	0.034	0.705	0.0078	0.0051	0.0021
4.2.1.91	Arogenate dehydratase.	0.034	0.703	0.0032	0.0021	0.00061
3.1.3.68	2-deoxyglucose-6-phosphatase.	0.034	0.705	0.0058	0.0044	0.0018
4.1.2.17	L-fuculose-phosphate aldolase.	0.035	0.702	0.0038	0.0023	0.0014
1.3.1.10	Enoyl-[acyl-carrier-protein] reductase (NADPH. Si-specific).	0.035	0.701	0.0048	0.0021	0
1.3.99.33	Urocanate reductase.	0.035	0.701	NA	-0.00015	0
1.1.1.274	2.5-didehydrogluconate reductase (2-dehydro-D-gluconate-forming).	0.035	0.701	0.0096	0.0083	0.0029
6.3.5.9	Hydrogenobyrinic acid a.c-diamide synthase (glutamine-hydrolyzing).	0.035	-0.703	1.2e-05	-1.1e-05	0
3.5.3.3	Creatinase.	0.036	-0.698	0.00031	-0.00063	0
2.1.1.79	Cyclopropane-fatty-acyl-phospholipid synthase.	0.036	0.699	0.0059	0.0044	0.0022
1.1.1.41	Isocitrate dehydrogenase (NAD(+)).	0.037	0.697	1.6e-05	-4.8e-05	0
3.5.1.77	N-carbamoyl-D-amino-acid hydrolase.	0.037	0.697	0.0015	0.00058	0.00052
2.3.3.5	2-methylcitrate synthase.	0.037	-0.698	0.00025	-4.4e-06	1.6e-05
3.6.1.9	Nucleotide diphosphatase.	0.037	0.698	0.0073	0.0073	0.0048
2.5.1.97	Pseudaminic acid synthase.	0.038	-0.695	NA	-2e-05	0
5.1.3.22	L-ribulose-5-phosphate 3-epimerase.	0.038	-0.695	0.002	0.00091	0.0013
3.5.1.78	Glutathionylspermidine amidase.	0.038	-0.694	0.00031	-0.00064	8.6e-06
1.1.1.157	3-hydroxybutyryl-CoA dehydrogenase.	0.038	0.695	0.0045	0.0032	0.00059
1.4.7.1	Glutamate synthase (ferredoxin).	0.039	-0.693	0.0048	-0.0031	-5.1e-06
3.5.1.32	Hippurate hydrolase.	0.039	0.691	0.01	0.0092	0.0023
1.2.2.2	Deleted entry.	0.039	-0.691	0.0021	-0.0006	-0.00017
5.3.1.n1	Transferred entry: 5.3.1.30.	0.039	-0.692	NA	-1.7e-06	0
7.2.4.5	Glutaconyl-CoA decarboxylase.	0.039	-0.692	0.0014	-0.00033	8.6e-06
3.5.1.91	N-substituted formamide deformylase.	0.039	0.692	0.011	0.0051	0.00013
1.1.1.95	Phosphoglycerate dehydrogenase.	0.039	0.692	0.0095	0.0082	0.0034
2.1.1.185	23S rRNA (guanosine(2251)-2'-O)-methyltransferase.	0.039	0.692	0.0076	0.005	0.0023
3.1.2.1	Acetyl-CoA hydrolase.	0.04	-0.69	0.0013	-0.0003	5.2e-05
4.1.1.35	UDP-glucuronate decarboxylase.	0.04	-0.69	0.00026	4.6e-06	0
3.4.13.3	Transferred entry: 3.4.13.18 and 3.4.13.20.	0.041	-0.687	0.0028	-0.0012	-4e-05
4.1.1.104	3-dehydro-4-phosphotetronate decarboxylase.	0.041	-0.687	0.00021	-0.00015	2.3e-05
3.4.23.48	Plasminogen activator Pla.	0.042	-0.685	0.00029	6.8e-05	0
1.17.1.4	Xanthine dehydrogenase.	0.042	-0.685	0.0021	-0.004	0.00071
1.3.7.9	4-hydroxybenzoyl-CoA reductase.	0.042	-0.684	0.0014	-0.0026	0.00087
1.2.7.4	Anaerobic carbon-monoxide dehydrogenase.	0.043	-0.681	0.00065	-0.00066	7.1e-05
2.5.1.83	Hexaprenyl-diphosphate synthase ((2E.6E)-farnesyl-diphosphate specific).	0.043	0.682	7.3e-06	-1.1e-05	0
5.4.99.16	Maltose alpha-D-glucosyltransferase.	0.043	0.682	0.0057	0.0031	7.7e-06
2.7.1.17	Xylulokinase.	0.044	0.68	0.015	0.011	0.0061
4.2.2.17	Inulin fructotransferase (DFA-I-forming).	0.044	-0.68	0.0013	-0.00042	0
1.1.1.9	D-xylulose reductase.	0.044	-0.679	0.00045	-0.0002	9.3e-05
3.1.27.-		0.044	-0.68	5.8e-05	-0.00014	1.5e-05
2.7.1.1	Hexokinase.	0.045	-0.677	0.0013	0.00025	0
4.2.1.129	Squalene--hopanol cyclase.	0.045	-0.678	1.6e-05	-1.8e-06	0
1.21.4.3	Sarcosine reductase.	0.046	-0.676	NA	-6.8e-06	0
1.21.4.4	Betaine reductase.	0.046	-0.676	NA	-6.8e-06	0
2.7.1.21	Thymidine kinase.	0.047	-0.673	0.0021	-0.00027	-0.00065
3.4.23.49	Omptin.	0.047	-0.674	0.00029	5.2e-05	0
1.2.1.68	Coniferyl-aldehyde dehydrogenase.	0.048	0.671	0.0062	0.0023	0
2.7.1.15	Ribokinase.	0.049	0.669	0.013	0.013	0.0095
4.2.1.81	D(-)-tartrate dehydratase.	0.049	-0.668	0.0003	-0.0005	0
MetaCyc pathways
Function	P Pearson correlation (sqrt)	r Pearson correlation (sqrt)	Mean Pos	Mean Abundance	Median Abundance
PWY-3001~superpathway of L-isoleucine biosynthesis I	0.014	0.778	0.01	0.0085	0.0082
PWY-5676~acetyl-CoA fermentation to butanoate II	0.019	0.753	0.011	0.006	0.00033
ANAEROFRUCAT-PWY~homolactic fermentation	0.02	0.75	0.0054	0.0041	0.0033
ANAGLYCOLYSIS-PWY~glycolysis III (from glucose)	0.023	0.738	0.0044	0.0039	0.0035
PWY-6744~hydrogen production I	0.025	0.731	NA	-2.1e-05	0
PWY18C3-24~methylsalicylate degradation	0.03	0.716	0.0093	0.0046	9.5e-05
PWY-5994~palmitate biosynthesis I (animals and fungi)	0.03	0.717	0.032	0.016	0.0088
PWY-6293~superpathway of L-cysteine biosynthesis (fungi)	0.03	-0.717	0.0047	0.0021	0
PWY-5747~2-methylcitrate cycle II	0.031	-0.712	0.00058	-0.00035	0
PWY-6606~guanosine nucleotides degradation II	0.032	-0.711	0.0012	-0.0015	0
PWY-6595~superpathway of guanosine nucleotides degradation (plants)	0.032	-0.71	0.001	-0.0012	0
GLYSYN-THR-PWY~glycine biosynthesis IV	0.034	0.706	0.0051	0.0039	0.0022
SALVADEHYPOX-PWY~adenosine nucleotides degradation II	0.037	-0.696	0.0019	-0.0019	0.00037
PWY0-541~cyclopropane fatty acid (CFA) biosynthesis	0.039	0.693	0.0058	0.0043	0.0022
PWY-2722~trehalose degradation IV	0.041	-0.687	0.00099	-0.00099	0
PWY-5695~inosine 5-phosphate degradation	0.042	-0.685	0.0018	-0.0016	0.00039
PWY-4341~L-glutamate biosynthesis V	0.042	-0.685	0.0046	-0.0034	-2.8e-05
PWY-2622~trehalose biosynthesis IV	0.043	0.682	0.0071	0.0031	0
PWY-6608~guanosine nucleotides degradation III	0.043	-0.682	0.0015	-0.0013	0.00029
HEXPPSYN-PWY~hexaprenyl diphosphate biosynthesis	0.043	0.682	7.3e-06	-1.1e-05	0
PWY-922~mevalonate pathway I	0.045	0.677	8.8e-05	1.4e-05	0
PWY-6780~hydrogen production VI	0.049	-0.668	0.0017	-0.0017	0.00061
Membrane Transport Proteins (TCDB)
Function	Annotation	P Pearson correlation (sqrt)	r Pearson correlation (sqrt)	Mean Pos	Mean Abundance	Median Abundance
2.A.1.7.18	The Major Facilitator Superfamily (MFS)	0.0026	-0.865	0.00014	-1.4e-05	0
1.B.6.2.20	The OmpA-OmpF Porin (OOP) Family	0.01	-0.797	8.2e-06	1.8e-06	0
2.A.1.6.6	The Major Facilitator Superfamily (MFS)	0.018	-0.759	0.00045	-0.00016	0
9.A.18.1.1	The Peptide Uptake Permease (PUP) Family	0.02	-0.749	4.2e-06	-1.5e-05	0
2.A.66.1.48	The Multidrug/Oligosaccharidyl-lipid/Polysaccharide (MOP) Flippase Superfamily	0.023	-0.738	0.00022	7.3e-05	0
2.A.1.15.13	The Major Facilitator Superfamily (MFS)	0.028	-0.722	0.00052	-0.00017	0
9.B.122.1.1	The DUF3592 or PF12158 (DUF3592) Family	0.03	-0.716	7e-05	2.9e-05	0
1.E.53.1.1	The Toxic Hok/Gef Protein (Hok/Gef) Family	0.033	-0.706	2.8e-05	-0.00013	0
8.A.21.2.2	The Stomatin/Podocin/Band 7/Nephrosis.2/SPFH (Stomatin) Family	0.036	-0.7	0.00037	-0.00027	0
2.A.2.3.9	The Glycoside-Pentoside-Hexuronide (GPH):Cation Symporter Family	0.037	-0.696	NA	-6.2e-06	0
1.A.23.4.3	The Small Conductance Mechanosensitive Ion Channel (MscS) Family	0.039	-0.693	0.00021	-0.00026	0
2.A.40.3.3	The Nucleobase/Ascorbate Transporter (NAT) or Nucleobase:Cation Symporter-2 (NCS2) Family	0.04	-0.689	0.00024	-0.0004	0
2.A.76.1.1	The Resistance to Homoserine/Threonine (RhtB) Family	0.04	-0.69	0.00018	-0.0003	0
8.A.99.1.1	The BLP Braun's Lipoprotein (Lpp) Family	0.04	-0.69	5.7e-05	-0.00012	0
2.A.4.1.4	The Cation Diffusion Facilitator (CDF) Family	0.041	-0.687	0.00024	-0.00027	0
1.A.77.3.11	The Mg<sup>2+</sup>/Ca<sup>2+</sup> Uniporter (MCU) Family	0.041	-0.687	0.0002	-0.00026	0
2.A.98.1.3	The Putative Sulfate Exporter (PSE) Family	0.041	-0.688	0.00019	-0.00033	0
1.A.62.2.3	The Homotrimeric Cation Channel (TRIC) Family	0.042	-0.684	0.00019	-0.00027	1.6e-05
1.B.14.1.20	The Outer Membrane Receptor (OMR) Family	0.042	-0.684	0.00054	-0.0016	0
3.A.1.14.1	The ATP-binding Cassette (ABC) Superfamily	0.043	-0.682	0.00041	-0.0013	0
1.A.35.4.1	The CorA Metal Ion Transporter (MIT) Family	0.043	-0.683	0.00031	-0.00024	0
9.B.275.1.1	The Phosphoethanolamine Transferase (PEAT) Family	0.045	-0.678	0.00056	-0.00061	0
1.B.18.3.1	The Outer Membrane Auxiliary (OMA) Protein Family	0.045	-0.677	0.00021	-0.00032	1.7e-07
5.A.3.2.1	The Prokaryotic Molybdopterin-containing Oxidoreductase (PMO) Family	0.046	-0.676	0.0005	-0.00044	0
2.A.1.17.3	The Major Facilitator Superfamily (MFS)	0.046	-0.674	0.00039	-0.00017	0
2.A.124.1.1	The Lysine Exporter (LysO) Family	0.047	-0.674	0.00019	-0.00025	0
2.A.3.1.3	The Amino Acid-Polyamine-Organocation (APC) Family	0.047	-0.672	0.00026	-0.00046	0
1.E.24.1.5	The Bacterophage Dp-1 Holin (Dp-1 Holin) Family	0.048	0.671	0.00011	3.7e-06	0
9.B.174.1.2	The Two Tunnel Gated C-terminal Processing Protease (CTP) Family	0.049	-0.669	0.0006	-0.0004	0
D- Fat relative difference:
Enzyme Commission (EC) numbers
Function	Annotation	P Pearson correlation (sqrt)	r Pearson correlation (sqrt)	Mean Pos	Mean Abundance	Median Abundance
3.1.3.68	2-deoxyglucose-6-phosphatase.	0.0022	0.872	0.0058	0.0044	0.0018
2.6.1.85	Aminodeoxychorismate synthase.	0.0023	0.869	0.0056	0.0042	0.0045
3.2.2.n1	Cytokinin riboside 5'-monophosphate phosphoribohydrolase.	0.0035	0.853	0.0033	0.0028	0.0022
4.2.1.91	Arogenate dehydratase.	0.0035	0.852	0.0032	0.0021	0.00061
3.6.3.4	Transferred entry: 7.2.2.9.	0.0047	0.839	0.019	0.017	0.0088
6.3.2.12	Dihydrofolate synthase.	0.0049	0.837	0.0052	0.0036	0.0033
3.1.1.1	Carboxylesterase.	0.0051	0.835	0.0094	0.0046	0.0001
3.1.3.3	Phosphoserine phosphatase.	0.0052	0.834	0.0075	0.0039	0.0017
4.1.2.5	L-threonine aldolase.	0.0057	0.83	0.0043	0.0033	0.0022
2.6.1.42	Branched-chain-amino-acid transaminase.	0.0061	-0.826	0.0031	-0.0002	-0.0012
3.5.3.1	Arginase.	0.0061	0.826	0.0051	0.002	-0.00019
2.7.7.63	Transferred entry: 6.3.1.20.	0.0066	0.822	0.0051	0.003	0.0012
2.7.1.33	Pantothenate kinase.	0.0067	-0.82	0.0022	0.00082	0.0011
1.5.99.8	Transferred entry: 1.5.5.2.	0.007	0.818	0.0089	0.0069	0.00024
7.1.2.2	H(+)-transporting two-sector ATPase.	0.0076	-0.814	0.0065	0.0015	0.004
1.1.1.61	4-hydroxybutyrate dehydrogenase.	0.0082	0.809	0.00016	-4e-05	0
3.1.26.5	Ribonuclease P.	0.0086	-0.807	0.0011	1.5e-05	5.4e-05
1.1.1.218	Morphine 6-dehydrogenase.	0.0086	0.807	0.0051	0.0032	0.00057
3.5.1.38	Glutamin-(asparagin-)ase.	0.0087	-0.806	0.00025	0.00011	0
2.7.1.184	Sulfofructose kinase.	0.0094	0.802	0.0032	0.0028	0.0023
3.1.3.18	Phosphoglycolate phosphatase.	0.0099	0.798	0.0096	0.0096	0.0055
3.6.1.11	Exopolyphosphatase.	0.011	0.792	0.012	0.01	0.0028
3.6.3.41	Transferred entry: 7.6.2.5.	0.012	0.787	0.016	0.0099	0.014
5.1.-.-		0.012	-0.789	0.00073	-0.0013	1.6e-05
3.6.3.25	Transferred entry: 7.3.2.3.	0.012	0.787	0.023	0.02	0.013
3.2.2.1	Purine nucleosidase.	0.015	0.77	0.0088	0.0053	0.003
2.3.1.117	2.3.4.5-tetrahydropyridine-2.6-dicarboxylate N-succinyltransferase.	0.015	0.773	0.0033	0.0025	0.0019
4.1.2.40	Tagatose-bisphosphate aldolase.	0.015	-0.773	0.0024	0.00014	4.6e-05
1.1.1.192	Long-chain-alcohol dehydrogenase.	0.016	0.768	0.0075	0.0058	5.6e-05
4.1.2.48	Low-specificity L-threonine aldolase.	0.016	0.766	0.0078	0.0051	0.0021
2.7.1.17	Xylulokinase.	0.017	0.764	0.015	0.011	0.0061
3.1.26.8	Ribonuclease M5.	0.018	-0.758	0.00053	-0.00096	-3.1e-07
2.5.1.72	Quinolinate synthase.	0.018	0.76	0.0031	0.0027	0.0027
3.2.1.14	Chitinase.	0.018	0.756	0.0096	0.0056	0.0024
2.4.1.-		0.018	0.756	0.051	0.051	0.044
1.1.3.15	(S)-2-hydroxy-acid oxidase.	0.018	0.76	0.0022	0.0013	0.0004
1.16.1.3	Aquacobalamin reductase.	0.019	0.755	0.0022	0.0017	0.00013
1.5.1.41	Riboflavin reductase (NAD(P)H).	0.019	0.754	0.0022	0.0017	0.00017
5.4.99.16	Maltose alpha-D-glucosyltransferase.	0.019	0.753	0.0057	0.0031	7.7e-06
3.6.3.24	Transferred entry: 7.2.2.11.	0.019	0.754	0.018	0.018	0.013
2.1.2.3	Phosphoribosylaminoimidazolecarboxamide formyltransferase.	0.021	-0.745	0.0024	0.00037	0.00082
2.6.1.57	Aromatic-amino-acid transaminase.	0.022	0.743	0.0067	0.006	0.0012
1.4.7.1	Glutamate synthase (ferredoxin).	0.023	-0.738	0.0048	-0.0031	-5.1e-06
2.1.3.2	Aspartate carbamoyltransferase.	0.023	-0.738	0.0029	0.0018	0.0021
2.1.1.185	23S rRNA (guanosine(2251)-2'-O)-methyltransferase.	0.023	0.74	0.0076	0.005	0.0023
2.3.1.128	Transferred entry: 2.3.1.267.	0.025	0.732	0.0057	0.005	0.0035
2.1.-.-		0.025	-0.733	0.0013	-0.00017	0.0002
6.3.2.17	Tetrahydrofolate synthase.	0.026	0.728	0.0064	0.0032	0.00092
3.5.2.2	Dihydropyrimidinase.	0.028	-0.723	0.00071	-0.0013	-0.00011
3.5.4.10	IMP cyclohydrolase.	0.028	-0.721	0.0022	0.00028	0.00033
1.1.1.346	2.5-didehydrogluconate reductase (2-dehydro-L-gulonate-forming).	0.029	0.72	0.0047	0.004	0.0011
3.6.3.19	Transferred entry: 7.5.2.1.	0.029	0.72	0.01	0.0091	0.0036
4.2.2.3	Mannuronate-specific alginate lyase.	0.029	-0.718	0.00091	-0.00038	0
2.7.1.36	Mevalonate kinase.	0.029	-0.718	0.00058	0.0003	3.1e-05
1.6.99.1	NADPH dehydrogenase.	0.031	0.714	0.0096	0.0073	0.0033
1.3.1.9	Enoyl-[acyl-carrier-protein] reductase (NADH).	0.031	0.714	0.014	0.0092	0.0046
3.4.11.4	Tripeptide aminopeptidase.	0.031	-0.714	0.0026	-0.0011	-0.0011
3.1.3.82	D-glycero-beta-D-manno-heptose 1.7-bisphosphate 7-phosphatase.	0.031	0.712	0.0013	0.0012	5e-05
3.1.3.41	4-nitrophenylphosphatase.	0.032	0.709	0.0044	0.0038	0.0011
2.1.1.171	16S rRNA (guanine(966)-N(2))-methyltransferase.	0.033	0.707	0.0033	0.003	0.0018
3.4.11.1	Leucyl aminopeptidase.	0.033	-0.708	0.0021	0.0007	0.0017
2.7.7.85	Diadenylate cyclase.	0.033	-0.706	0.0016	-0.0026	-0.0014
3.1.1.47	1-alkyl-2-acetylglycerophosphocholine esterase.	0.033	-0.708	8.1e-05	-2.2e-05	0
1.1.1.95	Phosphoglycerate dehydrogenase.	0.033	0.706	0.0095	0.0082	0.0034
3.4.23.43	Prepilin peptidase.	0.034	0.705	0.0026	0.0019	0.00075
1.2.3.3	Pyruvate oxidase.	0.035	-0.702	0.0014	-8e-05	-7.4e-06
6.2.1.3	Long-chain-fatty-acid--CoA ligase.	0.035	0.703	0.018	0.016	0.011
1.8.99.3	Transferred entry: 1.8.99.5.	0.036	-0.7	0.00015	-0.001	-9.2e-05
3.5.2.-		0.037	-0.698	0.0011	-0.0016	0.00017
2.7.1.76	Deoxyadenosine kinase.	0.037	-0.697	4e-05	1.9e-05	7.8e-06
1.14.11.33	DNA oxidative demethylase.	0.037	0.697	0.0013	0.0012	0.00011
3.1.1.5	Lysophospholipase.	0.037	0.696	0.0051	0.0045	0.0041
1.6.8.-		0.037	0.697	0.0014	0.0009	0.00017
2.1.1.74	Methylenetetrahydrofolate--tRNA-(uracil(54)-C(5))-methyltransferase	0.037	-0.697	0.00072	-0.0015	2.3e-05
6.-.-.-		0.037	0.697	0.0035	0.0026	0.00011
2.1.2.-		0.037	0.696	0.0044	0.0044	0.0038
3.5.4.12	dCMP deaminase.	0.038	-0.694	0.00074	-0.00041	-0.00019
3.4.22.-		0.038	0.694	0.011	0.0038	0.0035
4.1.1.33	Diphosphomevalonate decarboxylase.	0.039	-0.691	0.00049	0.00022	2.4e-05
5.3.4.1	Protein disulfide-isomerase.	0.04	0.689	0.0037	0.0033	0.0001
1.1.1.154	Ureidoglycolate dehydrogenase.	0.04	-0.689	0.00056	-0.0015	0.00034
2.1.1.37	DNA (cytosine-5-)-methyltransferase.	0.041	0.686	0.0057	0.0038	0.0043
2.7.14.1	Protein arginine kinase.	0.042	-0.684	0.00075	-0.0013	-4e-05
1.1.1.274	2.5-didehydrogluconate reductase (2-dehydro-D-gluconate-forming).	0.043	0.682	0.0096	0.0083	0.0029
3.2.2.24	ADP-ribosyl-[dinitrogen reductase] hydrolase.	0.043	-0.681	0.0016	-0.0011	-8.9e-06
5.1.3.33	2-epi-5-epi-valiolone epimerase.	0.044	0.679	0.0016	0.001	9.5e-05
2.1.1.34	tRNA (guanosine(18)-2'-O)-methyltransferase.	0.044	0.68	0.0059	0.0051	0.0044
4.3.99.-		0.044	-0.679	0.00049	-0.00048	0
4.2.2.17	Inulin fructotransferase (DFA-I-forming).	0.045	-0.677	0.0013	-0.00042	0
1.5.1.7	Saccharopine dehydrogenase (NAD(+). L-lysine-forming).	0.045	-0.676	0.00086	-0.001	-0.00045
1.1.1.76	(S.S)-butanediol dehydrogenase.	0.046	-0.676	0.0006	-0.0003	0
1.1.1.301	D-arabitol-phosphate dehydrogenase.	0.046	-0.676	0.00045	-0.00077	-2.3e-05
3.5.1.32	Hippurate hydrolase.	0.046	0.676	0.01	0.0092	0.0023
2.7.7.6	DNA-directed RNA polymerase.	0.046	-0.675	0.017	0.011	0.016
1.1.1.5	Transferred entry: 1.1.1.303 and 1.1.1.304.	0.047	-0.673	7.5e-06	-1.8e-05	0
3.5.1.6	Beta-ureidopropionase.	0.047	0.673	0.005	0.0032	0.00013
3.2.1.54	Cyclomaltodextrinase.	0.048	0.671	0.01	0.0075	0.0031
1.1.1.14	L-iditol 2-dehydrogenase.	0.048	-0.672	0.0037	-0.00045	0.002
1.1.99.5	Transferred entry: 1.1.5.3.	0.048	-0.671	0.00031	-0.00046	-4.2e-07
2.7.6.3	2-amino-4-hydroxy-6-hydroxymethyldihydropteridine diphosphokinase.	0.048	0.671	0.0031	0.0019	0.0016
7.2.4.5	Glutaconyl-CoA decarboxylase.	0.048	-0.671	0.0014	-0.00033	8.6e-06
5.4.99.28	tRNA pseudouridine(32) synthase.	0.049	0.669	0.0046	0.0041	0.0032
MetaCyc group
Function	P Pearson correlation (sqrt)	r Pearson correlation (sqrt)	Mean Pos	Mean Abundance	Median Abundance
Fatty Acid and Lipid Biosynthesis	0.016	0.767	0.24	0.2	0.13
Metabolic Regulator Biosynthesis	0.038	0.695	0.013	0.011	0.014
Storage Compound Biosynthesis	0.039	0.691	1.7e-05	-0.00011	0
MetaCyc pathways
Function	P Pearson correlation (sqrt)	r Pearson correlation (sqrt)	Mean Pos	Mean Abundance	Median Abundance
PWY-6614~tetrahydrofolate biosynthesis	0.0017	0.88	0.0064	0.0039	0.0017
PWY18C3-24~methylsalicylate degradation	0.0051	0.835	0.0093	0.0046	9.5e-05
ARG-PRO-PWY~L-arginine degradation VI (arginase 2 pathway)	0.0069	0.819	0.0053	0.0027	7.9e-05
PWY-7432~L-phenylalanine biosynthesis III (cytosolic plants)	0.012	0.788	0.0062	0.0055	0.0018
TYRSYN~L-tyrosine biosynthesis I	0.015	0.772	0.006	0.0054	0.002
ARGASEDEG-PWY~L-arginine degradation I (arginase pathway)	0.016	0.769	0.0089	0.0045	0.00011
GLYSYN-THR-PWY~glycine biosynthesis IV	0.016	0.767	0.0051	0.0039	0.0022
PWY-3001~superpathway of L-isoleucine biosynthesis I	0.017	0.761	0.01	0.0085	0.0082
PWY-2622~trehalose biosynthesis IV	0.018	0.76	0.0071	0.0031	0
PWY-7518~atromentin biosynthesis	0.021	0.746	0.0069	0.0062	0.0018
PWY-5886~4-hydroxyphenylpyruvate biosynthesis	0.021	0.746	0.0069	0.0062	0.0018
PWY-4341~L-glutamate biosynthesis V	0.021	-0.745	0.0046	-0.0034	-2.8e-05
PWY-5994~palmitate biosynthesis I (animals and fungi)	0.022	0.741	0.032	0.016	0.0088
SER-GLYSYN-PWY~superpathway of L-serine and glycine biosynthesis I	0.023	0.738	0.0052	0.0027	0.00083
PWY3O-355~stearate biosynthesis III (fungi)	0.026	0.73	0.034	0.014	0
SERSYN-PWY~L-serine biosynthesis I	0.028	0.722	0.0062	0.0044	0.0022
PWY-6897~thiamine salvage II	0.028	0.721	0.0033	0.0033	0.0028
PWY-7847~heme degradation VI	0.032	-0.709	7.7e-06	-6.6e-08	0
PWY-6470~peptidoglycan biosynthesis V (Î²-lactam resistance)	0.033	-0.707	0.0013	0.00073	5.9e-05
PWY-5143~long-chain fatty acid activation	0.035	0.701	0.018	0.016	0.011
PWY-7560~methylerythritol phosphate pathway II	0.04	0.689	0.0044	0.0039	0.0035
GLUTDEG-PWY~L-glutamate degradation II	0.04	0.69	0.026	0.023	0.012
HSERMETANA-PWY~L-methionine biosynthesis III	0.043	-0.682	0.0014	-0.0017	-0.00081
XYLCAT-PWY~D-xylose degradation I	0.044	0.681	0.012	0.0072	0.0032
PWY-6599~guanine and guanosine salvage II	0.045	0.678	0.0046	0.0032	0.0015
TREDEGLOW-PWY~trehalose degradation I (low osmolarity)	0.045	0.678	0.011	0.0084	0.0047
PWY-6388~(SS)-butanediol degradation	0.046	-0.676	0.0006	-0.0003	0
PWY-6390~(SS)-butanediol biosynthesis	0.046	-0.676	0.0006	-0.0003	0
ASPARTATE-DEG1-PWY~L-aspartate degradation I	0.048	0.67	0.048	0.042	0.02
ASPARTATESYN-PWY~L-aspartate biosynthesis	0.048	0.67	0.048	0.042	0.02
Membrane Transport Proteins (TCDB)
Function	Annotation	P Pearson correlation (sqrt)	r Pearson correlation (sqrt)	Mean Pos	Mean Abundance	Median Abundance
3.A.11.1.2	The Bacterial Competence-related DNA Transformation Transporter (DNA-T) Family	0.0034	-0.854	1.5e-05	4.1e-06	7.9e-06
2.A.4.1.2	The Cation Diffusion Facilitator (CDF) Family	0.015	0.771	1.2e-05	1.8e-06	0
2.A.1.46.10	The Major Facilitator Superfamily (MFS)	0.019	-0.752	2.3e-05	-1.4e-07	0
2.A.80.1.1	The Tricarboxylate Transporter (TTT) Family	0.038	-0.694	0.002	-0.00098	-8.4e-06
2.A.1.1.115	The Major Facilitator Superfamily (MFS)	0.043	-0.683	0.00021	-0.0006	3.9e-05
2.A.2.3.9	The Glycoside-Pentoside-Hexuronide (GPH):Cation Symporter Family	0.048	-0.671	NA	-6.2e-06	0
2.A.8.1.4	The Gluconate:H<sup>+</sup> Symporter (GntP) Family	0.049	-0.668	0.00077	-0.0013	5e-05
2.A.1.3.4	The Major Facilitator Superfamily (MFS)	0.049	-0.669	1.2e-05	1.7e-06	0
